# Supplementary material for: Psychotropic Medication Prescribing for Neuropsychiatric Comorbidities in Individuals Diagnosed with Autism Spectrum Disorder (ASD) in the UK
Source: PubMed Central journal article supplement (PMC6994549; doi:10.1007/s10803-019-04291-8), 2019-11-13
Supplement: 10803_2019_4291_MOESM1_ESM.pdf [file 10803_2019_4291_MOESM1_ESM.pdf]

**Journal:**

Journal of Autism and Developmental Disorders.

**Title:**

Psychotropic Medication Prescribing for Neuropsychiatric Comorbidities in Individuals Diagnosed with Autism Spectrum Disorder (ASD) in the UK

**Authors:**

Basmah H Alfageh; Kenneth K. C. Man; Frank MC Besag; Tariq M Alhawassi; Ian CK Wong; Ruth Brauer

**Corresponding author:**

Dr. Ruth Brauer, PhD.

Research Department of Practice and Policy, School of Pharmacy University College London

BMA House Tavistock Square London WC1H 9JP, London, UK

E-mail: [r.brauer@ucl.ac.uk](mailto:r.brauer@ucl.ac.uk)

Tel: +44(0)20 7874 1273

## Appendix A. Psychotropic medication list

| Antipsychotics  | Antidepressants | Hypnotics          | Anxiolytics             | Stimulants       | Antiepileptics      |
|-----------------|-----------------|--------------------|-------------------------|------------------|---------------------|
| Amisulpride     | Agomelatine     | Chloral            | Alprazolam              | Amphetamine      | Acetazolamide       |
| Aripiprazole    | Amitriptyline   | Clomethiazole      | Bromazepam              | Atomoxetine      | Beclamide           |
| Asenapine       | Amoxapine       | Cloral betaine     | Buspirone               | Caffeine         | Brivaracetam        |
| Benperidol      | Bolvidon        | Clorazepate        | Chlordiazepoxide        | Dexamfetamine    | Carbamazepine       |
| Chlorpromazine  | Butriptyline    | Dichloralphenazone | Chlordiazepozide        | Dexedrine        | Clobazam            |
| Chlorprothixene | Citalopram      | Flunitrazepam      | Chlormezanone           | Guanfacine       | Clonazepam          |
| Clozapine       | Clomipramine    | Flurazepam         | Clobazam                | Lisdexamfetamine | Diazepam            |
| Dartalan        | Desipramine     | Loprazolam         | Clorazepate dipotassium | Methylperidate   | Eslicarbazepine     |
| Droperidol      | Dosulepin       | Lormetazepam       | Diazepam                | Methylphenidate  | Ethosuximide        |
| Flupentixol     | Dothiepin       | Mandrax            | Generic Kalms tablets   | Modafinil        | Fosphenytoin        |
| Fluphenazine    | Doxepin         | Melatonin          | Ketazolam               | Pemoline         | Gabapentin          |
| Haldol          | Duloxetine      | Methyprylon        | Lorazepam               | Reactivan tab    | Gardenal            |
| Haloperidol     | Escitalopram    | Nitrados           | Medazepam               | Ronyl            | Lacosamide          |
| Levomepromazine | Fluoxetine      | Nitrazepam         | Meprobamate             | Sodium oxybate   | Lamotrigine         |
| Loxapine        | Flupentixol     | Potassium bromide  | Oxazepam                | Tafamidis        | Levetiracetam       |
| Lurasidone      | Fluvoxamine     | Promethazine       | Prazepam                |                  | Mesuximide          |
| Olanzapine      | Imipramine      | Sodium oxybate     | Serenid forte           |                  | Methsuximide        |
| Oxypertine      | Iprindole       | Temazepam          |                         |                  | Methylphenobarbital |
| Paliperidone    | Iproniazid      | Triazolam          |                         |                  | Midazolam           |
| Pericyazine     | Isocarboxazid   | Triclofos          |                         |                  | Ospolot             |
| Perphenazine    | Lofepramine     | Zaleplon           |                         |                  | Oxcarbazepine       |
| Pimozide        | L-tryptophan    | Zolpidem           |                         |                  | Paraldehyde         |
| Promazine       | Maprotiline     | Zopiclone          |                         |                  | Paramethadione      |
| Quetiapine      | Merital         |                    |                         |                  | Pentamidine         |
| Remoxipride     | Mianserin       |                    |                         |                  | Perampanel          |
| Risperidone     | Mirtazapine     |                    |                         |                  | Phenobarbital       |
| Sertindole      | Moclobemide     |                    |                         |                  | Phenobarbitone      |
| Sulpiride       | Nefazodone      |                    |                         |                  | Phenytoin           |

|                 |                 |  |  |  |               |
|-----------------|-----------------|--|--|--|---------------|
| Thiopropazate   | Nomifensine     |  |  |  | Pregabalin    |
| Thiopropazine   | Nortriptyline   |  |  |  | Primidone     |
| Thioridazine    | Paroxetine      |  |  |  | Retigabine    |
| Trifluoperazine | Phenelzine      |  |  |  | Rufinamide    |
| Trifluoperidol  | Protriptyline   |  |  |  | Stiripentol   |
| Zotepine        | Reboxetine      |  |  |  | Sulthiame     |
| Zuclopenthixol  | Sertraline      |  |  |  | Tiagabine     |
|                 | Sinequan        |  |  |  | Topiramate    |
|                 | Tofranil        |  |  |  | Valproic acid |
|                 | Tranlycypromine |  |  |  | Vigabatrin    |
|                 | Trazodone       |  |  |  | Zarontin      |
|                 | Trimipramine    |  |  |  | Zonisamide    |
|                 | Tryptophan      |  |  |  |               |
|                 | Venlafaxine     |  |  |  |               |
|                 | Viloxazine      |  |  |  |               |
|                 | Vortioxetine    |  |  |  |               |
|                 | Zimelidine      |  |  |  |               |
